1 Filamentous calcareous alga provides a substrate for coral-  
2 competitive macroalgae in the degraded lagoon of Dongsha  
3 Atoll, Taiwan

4 **Short title:** Filamentous calcareous alga provides substrate for coral-competitive  
5 macroalgae

6

7 Carolin Nieder<sup>1</sup>, Chaolun Allen Chen<sup>2,3,4</sup>, and Shao-Lun Liu<sup>5\*</sup>

8 <sup>1</sup>Institute of Marine Science, University of Auckland, Auckland, New Zealand

9 <sup>2</sup>Biodiversity Research Center, Academia Sinica, Taipei 115, Taiwan

10 <sup>3</sup>Institute of Oceanography, National Taiwan University, Taipei 106, Taiwan

11 <sup>4</sup>Department of Life Science, National Taiwan Normal University, Taipei 106,  
12 Taiwan

13 <sup>5</sup>Department of Life Science & Center for Ecology and Environment, Tunghai  
14 University, Taichung, Taiwan

15

16

17 \* Corresponding author; E-mail: shaolunliu@gmail.com (SLL)

18

19 **Abstract**

20 **Background:** The chemically-rich seaweed *Galaxaura* is not only highly competitive  
21 with corals, but also provides substrate for other macroalgae. Its ecology and  
22 associated epiphytes remain largely unexplored. To fill this knowledge gap, we herein  
23 undertook an ecological assessment to explore the spatial variation, temporal  
24 dynamics, and epiphytic macroalgae of *G. divaricata* on patch reefs in the lagoon of  
25 Dongsha Atoll, a shallow coral reef ecosystem in the northern South China Sea,  
26 repeatedly impacted by mass coral bleaching events.

27 **Methods:** Twelve spatially independent patch reefs in the Dongsha lagoon were first  
28 surveyed to assess the benthic composition in April 2016, and then revisited to  
29 determine *G. divaricata* percent cover in September 2017, with one additional  
30 *Galaxaura*-dominated reef (site 9). Four surveys over a period of 17 months were  
31 carried out on a degraded patch reef (site 7) to assess the temporal variation in *G.*  
32 *divaricata* cover. Epiphytic macroalgae associated with *G. divaricata* were quantified  
33 and identified through the aid of DNA barcoding.

34 **Results:** Patch reefs in the Dongsha lagoon were degraded, exhibiting relatively low  
35 live coral cover (5-43%), but high proportions of macroalgae (13-58%) and other  
36 substrates (rubble and dead corals; 23-69%). The distribution of *G. divaricata* was  
37 heterogeneous across the lagoon, with highest abundance (16-41%) in the southeast

38 area. Temporal surveys from site 7 and photo-evidence from site 9 suggested that an  
39 overgrowth by *G. divaricata* was still present to a similar extent after 17 months and  
40 3.5 years. Yet, *G. divaricata* provides a suitable substrate for some allelopathic  
41 macroalgae (e.g., *Lobophora* sp.).

42 **Conclusions:** Our study demonstrates that an allelopathic seaweed, such as *G.*  
43 *divaricata*, can overgrow degraded coral reefs for extended periods of time. By  
44 providing habitat for harmful macroalgae, a prolonged *Galaxaura* overgrowth could  
45 strengthen negative feedback loops on degraded coral reefs, further decreasing their  
46 recovery potential.

47

48 **Keywords:** coral reef; epiphyte; *Galaxaura*; lagoon; macroalgae; phase-shift.

49

## 50 **Introduction**

51 Coral-macroalgae competition is a naturally ecological process on coral reefs  
52 [1]. However, anthropogenic disturbances, e.g., climate change, overfishing, and  
53 pollution, have intensified space competition of macroalgae against corals and in turn  
54 led to a phase shift from a coral-dominated to a macroalgae-dominated ecosystem [2].  
55 The recovery of live corals on degraded reefs is strongly influenced by the types of  
56 dominant macroalgae, i.e., allelopathic versus non-allelopathic types [3,4].

57 Allelopathic macroalgae produce lipid-soluble secondary metabolites, e.g., loliolide  
58 derivatives or terpenes, that are poisonous to corals (known as allelochemicals). Such  
59 allelochemicals are capable of bleaching and killing coral tissue [5], decreasing the  
60 photosynthetic efficiency of zooxanthellae [6], and altering the coral microbiome,  
61 ultimately decreasing coral health [7,8]. Allelopathic macroalgae are considered most  
62 detrimental for the resilience of coral reefs [12], as these types may perpetuate their  
63 dominance by deterring coral larval settlement, and inhibiting the growth and survival  
64 of juvenile recruits, key processes of coral reef recovery [9-11].

65         The red upright calcifying seaweed *Galaxaura* is known to be highly  
66 allelopathic against corals. Life history of the genus *Galaxaura* can be grouped into  
67 two morphotypes, a smooth and a filamentous type. The latter is characterized by  
68 hairy branches that are covered with fine assimilatory filaments [12]. Extracts of the  
69 lipid-soluble secondary metabolites of *G. filamentosa* were shown to cause bleaching  
70 and death of coral tissue [13,14], and deterred coral larvae from settling [15]. It has  
71 thus been suggested that high abundance of *Galaxaura* on degraded reefs can inhibit  
72 the recovery of live coral cover [4,15,16].

73         The filamentous morphotype of *G. divaricata*, is widely distributed in  
74 subtropical and tropical reef areas in the Pacific Ocean [17]. Filamentous *G.*  
75 *divaricata* is also common on coral reefs in the shallow lagoon of Dongsha Atoll [18].



76 Dongsha Atoll is the only large (> 500 km<sup>2</sup>) coral reef atoll in the northern South  
77 China and represents a highly valuable hot-spot for marine biodiversity in this region  
78 [19]. A catastrophic mass bleaching in 1998 and reoccurring bleaching events  
79 thereafter have, however, caused severe mass mortalities of corals in the Dongsha  
80 lagoon, followed by a marked increase of macroalgae [20,21]. To date, little is known  
81 about the current state of recovery and dominant macroalgae in Dongsha lagoon patch  
82 reefs. The proliferation of *G. divaricata* on degraded reefs in the lagoon of Dongsha  
83 Atoll was first uncovered during a systematic macroalgae sampling expedition in  
84 February 2014 [18]. Of interest to us was our observation that *G. divaricata* was  
85 highly populated by macroalgae. Habitat formation is known from other macroalgae  
86 (e.g., crustose *Lobophora* or canopy-forming *Sargassum* and *Turbinaria*) that provide  
87 substrate for epiphytic algae [22-24]. The dense epiphytic community associated with  
88 *G. divaricata* might indicate a previously unappreciated role of *Galaxaura* as a habitat  
89 forming seaweed.

90         The goals of this study were to 1) assess the benthic composition of lagoon  
91 patch reefs, 2) document the spatial distribution of *G. divaricata* on patch reefs in the  
92 lagoon, 3) monitor the temporal dynamics of *G. divaricata* percent cover over time,  
93 and 4) quantify and identify the epiphytic macroalgae associated with *G. divaricata*.  
94 The provision of new habitat for other macroalgae by *G. divaricata* could have

95 several ecological implications, worth exploring. For instance, the epiphytic  
96 community on *G. divaricata* may enhance macroalgae biodiversity on the reef, or  
97 provide trophic support for herbivores, while a facilitation of allelopathic algal types  
98 would decrease the resilience of coral reefs.

99

## 100 **Materials and methods**

### 101 **Ethics statement**

102 The ecological assessments and sample collections in this study were  
103 conducted with permissions of the Dongsha Atoll National Park.

104

### 105 **Site description**

106 This study was conducted from April in 2016 to September 2017 in the lagoon  
107 of Dongsha Atoll (also known as Pratas Island; 20°40'43" N, 116°42'54" E), which is  
108 an isolated coral reef atoll in the northern South China Sea. The atoll covers an area of  
109 approximately 500 km<sup>2</sup> and is situated 450 km southwest from the coast of Taiwan  
110 and 350 km southeast from Hong Kong (Fig 1A). The climate is seasonal and varies  
111 between a northeast monsoon winter (October-April) and southwest monsoon summer  
112 (May-September) [25]. Field work during the northeast winter monsoon is often  
113 restricted due to local weather conditions. The ring-shaped reef flat encircles a large

114 lagoon with seagrass beds and hundreds of coral patch reefs [26]. Channels, at the  
115 north and south of the small islet (1.74km<sup>2</sup>), interrupt the reef flat, allowing for water  
116 exchange between the lagoon and the open ocean. The semi-closed lagoon is about 20  
117 km wide with a maximum depth of 16 m near the center [20]. The Lagoon patch reefs  
118 are structured into reef tops (1-5 m depth) and reef slopes (5-12 m depth), and provide  
119 important habitat and sheltered nursery grounds for numerous marine organisms, such  
120 as green sea turtles and coral reef fish, including rays and sharks [26]. For background  
121 information the lagoon water temperature was measured at each survey site, every 30  
122 min from March 2016 to September 2017 using HOBO Pendant® Temperature/Light  
123 8K Data Loggers (UA-002-08, Onset Computer Corporation, USA). Water  
124 temperatures were highest during the summer monsoon, averaging 30.1°C, and lowest  
125 during the winter monsoon, averaging 24.8°C. Maximum temperatures from July to  
126 August reached 34°C on reef tops and 32.7°C on reef slopes.

127

128 **Spatial variation in benthic composition and *G. divaricata* cover of lagoon patch**  
129 **reefs**

130 To assess the benthic composition of patch reefs in the lagoon of Dongsha  
131 Atoll, 12 spatially independent reefs were initially surveyed with SCUBA in April  
132 2016 (Fig 1B and S1 Table). A 45-m transect was laid out across each reef area: reef

133 top (1-5 m depth) and reef slope (5-12 m depth). The two transects were 10-20 m  
134 apart from each other. The percent cover of live corals, total macroalgae (MA; all  
135 upright growing (including *G. divaricata*) and crustose non-coralline seaweeds, and  
136 low growing, filamentous turf algae [27]), crustose coralline algae (CCA), and other  
137 substrates was estimated using a 35 cm x 50 cm PVC sapling frame [28]. Other  
138 substrates mainly constituted dead coral skeleton, rubble, and rocks covered with  
139 sediments. Estimates were done *in-situ* at every meter mark, with a total of 45  
140 sampling frames analyzed per transect. The 12 sites were revisited in September 2017  
141 to estimate the percent cover of *G. divaricata* and live corals only, using the same  
142 survey method described above. An additional patch reef (site 9) was included, as this  
143 site was historically shown to be dominated by *G. divaricata* based on photo evidence,  
144 resulting in a total of 13 survey sites (Fig 1B and S1 Table). The diameter of  
145 haphazardly selected *G. divaricata* thalli were measured *in situ* at each site and  
146 classified as small (1-5 cm diameter), medium (>5-15 cm diam.), and large (>15-30  
147 cm diam.).

#### 148 **Temporal variation in *G. divaricata* cover**

149 To assess variations in the *G. divaricata* cover over time, we selected the slope  
150 area of a degraded patch reef (site 7) that was considerably overgrown by *G.*  
151 *divaricata* (14-18%) and had relatively low coral cover (13-19%). Percent cover of *G.*

152 *divaricata*, and live corals were estimated in April 2016, the last month of the winter  
153 monsoon season, and three times in the summer monsoon season in July, and  
154 September 2016, and in September 2017, spanning a period of 17 months. At each  
155 time 45 photographs were taken in 1 m intervals along a 45 m fixed transect with an  
156 Olympus Stylus-TOUGH TG4 digital camera (25-100 lens, 35mm equivalent)  
157 mounted onto a PVC-quadrat (height = 0.64 cm) above a 35 cm x 50 cm sampling  
158 frame. Cover estimates were obtained from photographs using ImageJ software, and a  
159 superimposed 10 x 10 reference grid, where 1 square represented 1 % of the total grid  
160 area. *G. divaricata* cover estimates were arbitrarily ranked into four different  
161 categories: very low (0-1.5%), low (>1.5 – 5%), high (>5-20%), and very high  
162 (>20%).

163

#### 164 **Epiphytic macroalgae associated with *G. divaricata***

165 This study was carried out in September 2017. Thirty thalli of *G. divaricata*  
166 were collected from a degraded reef (site 7) with relatively high percent cover of *G.*  
167 *divaricata* (14-18%). *G. divaricata* thalli were haphazardly collected along a 45-m  
168 transect at 5 m depth. Epiphytic macroalgae were removed and identified to the  
169 closest identifiable taxonomic unit, using either the Dongsha seaweed guide book [18]  
170 or DNA barcoding. The presence and absence of each taxonomic unit was recorded,

171 and the occurrence frequency ( $f$ ) was calculated as follow:  $f = c$  (*taxonomic unit<sub>i</sub>*)/ $n$ ,  
172 where  $c$  (*taxonomic unit<sub>i</sub>*) stands for the count number of thalli that have the epiphyte  
173 taxonomic unit  $i$ , and  $n$  equals 30, the total number of thalli analyzed. For DNA  
174 barcoding, macroalgae samples were preserved in silica gel after collection, and the  
175 total genomic DNA of samples was extracted with Quick-DNA™ Plant/Seed  
176 Miniprep Kit (Zymo Research Co., USA). Primers for the plastid gene specific  
177 amplifications were used as follows: *rbcL* F7/R753 for red algae [29], *rbcL* F68/R708  
178 for brown algae [30], and *tufA* F210/R1062 for green algae [31]. The newly generated  
179 sequences were deposited in GenBank and searched using BLASTn against the  
180 GenBank database (S2 and S3 Tables). Sequence similarities of >98% were  
181 considered for species identification.

182

### 183 **Statistical analysis**

184 Spatial variations in the percent cover of major benthic categories (corals, total  
185 macroalgae, crustose coralline algae, and other substrates) and *G. divaricata* were  
186 compared between two reef areas (top and slope) among sites using a two-way  
187 ANOVA, with area and site as fixed factors. Similarly, a two-way ANOVA was  
188 applied to evaluate the temporal variations in the cover of two major benthic  
189 categories (live corals and *G. divaricata*) among four time points, with benthic

190 category and time as fixed factors. A significant difference was considered for p-

191 values lower than 0.05. Maps and statistical graphs were done using R software.

192

## 193 **Results**

### 194 **Benthic composition**

195 Our spatial survey showed that both live coral cover and total macroalgae

196 cover significantly varied between reef top (1-5 m) and reef slope (5-10 m) and

197 among sites (area  $\times$  site:  $F_{11, 1056} = 17.601-26.27$ ,  $P < 0.05$ ; Figs 2A and 2B, and S4

198 Table). Percent cover for corals, macroalgae, and CCA were generally higher on the

199 reef top, while other substrates were slightly higher on the slope (area:  $F_{1, 1056} =$

200  $6.617-62.725$ ,  $P < 0.05$ ; Figs 2A-2C and S4 Table). We found that the macroalgae

201 cover generally exceeded live coral cover on patch reefs in the Dongsha lagoon (Figs

202 2A and 2B). Using an arbitrary cutoff of 25%, we observed a higher coral cover in the

203 west of the lagoon, in between the North and South channel, where water exchange is

204 more efficient, i.e., sites 1-3, 8, 11, and 13 (Fig 2A). In contrast, no clear spatial

205 pattern of the macroalgae cover was observed. Using a 50% cutoff, it, however,

206 appeared that the shallow and calm area in the southeast lagoon showed a higher

207 macroalgae cover than other areas (i.e., sites 7 and 10; Fig 2B). Compared with live

208 corals and total macroalgae, the CCA cover was relatively low (range: 1-3%; Fig 2C),

209 while the average “other substrates” cover (mainly dead coral skeletons, rubble, and  
210 rocks) was extremely high (range: 23-69%; Fig 2D).

211

## 212 **Spatial variations in *G. divaricata* cover**

213 The percent cover of *Galaxaura divaricata* was significantly different between  
214 reef tops and reef slopes, showing a higher percent cover on the slope (area:  $F_{1, 1144} =$   
215  $6.574$ ,  $P < 0.05$ ; S5 Table). There was a significant statistical interaction between area  
216 (slope and top) and site (e.g., top > slope at site 5 and slope > top at site 7; area  $\times$  site:  
217  $F_{12, 1144} = 7.460$ ,  $P < 0.05$ ; Fig 3 and S5 Table). *G. divaricata* cover was significantly  
218 different among the 13 sites (site:  $F_{12, 1144} = 179.278$ ,  $P < 0.05$ ; Fig 3 and S5 Table),  
219 showing highest cover in the southeast area of the lagoon, i.e., site 9 (41%) and the  
220 slope of site 7 (16%) (Fig 3). Patch reefs in the northeast lagoon exhibited moderate,  
221 low, and very low cover of *G. divaricata* (range: 0.21-5.7%) (Fig 3 and S6 Table).  
222 Survey sites in the south, center, west, and north of the lagoon were characterized by  
223 very low cover of *G. divaricata* (range: 0-1.4%; Fig 3 and S6 Table). During our  
224 survey, we observed that the thallus shape and size of *G. divaricata* varied across sites  
225 (S1 Fig). Small ball-shaped or slender thalli were dominant on patch reefs in the  
226 northeast lagoon, while medium ball-shaped and large, carpet-like thalli were  
227 exclusively present in the southeast lagoon. To further rule out the possibility of



228 cryptic species, our DNA barcoding analyses confirmed that all samples across sites  
229 were 100% identical in their *rbcL* sequences, indicative of conspecificity (S3 Table).

230

### 231 **Temporal dynamics of *G. divaricata* cover**

232 Our temporal survey at a *Galaxaura*-dominated reef (the slope area of site 7)  
233 revealed that the percent cover of *G. divaricata* did not vary significantly among the  
234 surveys conducted at four time points (April 2016, July 2016, September 2016, and  
235 September 2017) over a period of 17 months (time:  $F_{3, 352} = 0.632$ ,  $P = 0.595$ ; Fig 4  
236 and S7 Table). The percent cover between live corals and *G. divaricata* did not differ  
237 significantly (benthic category:  $F_{1, 352} = 0.086$ ,  $P = 0.770$ ; Fig 4 and S7 Table).  
238 Overall, there was no significant statistical interaction between the percent cover of *G.*  
239 *divaricata* and live corals among time points (benthic category  $\times$  time:  $F_{3, 352} = 0.363$ ,  
240  $P = 0.780$ ; Fig 4 and S7 Table). Across four time points the mean *G. divaricata* cover  
241 remained relatively high ( $16.45 \pm 1.17\%$ ), while mean coral cover was low ( $15.91 \pm$   
242  $0.6\%$ ). In addition, we provide photo-evidence from an additional patch reef (site 9, 3-  
243 5 m) overgrown by *G. divaricata*. Photographs of the site were taken in February  
244 2014 and in September 2017, showing that the same *G. divaricata* overgrowth was  
245 present after 3.5 years (Figs 5A and 5B). *G. divaricata* frequently grew on live corals,  
246 where the holdfast penetrated the calcium-carbonate structure, creating a strong

247 attachment to the corals (Fig 5C). In several cases we observed a fluorescent pink  
248 discoloration and bleaching of the coral tissue at the contact zone with *G. divaricata*,  
249 strongly indicative of allelopathic inhibition by *G. divaricata* (Fig 5D).

250

### 251 **Epiphytic macroalgae associated with *G. divaricata***

252 We identified 21 taxonomic groups of macroalgae, including macroscopic  
253 filamentous cyanobacteria, in association with *G. divaricata* (Table 1 and S2 Table).  
254 Among these, 15 were identified to the species level, with seven species of red algae,  
255 three species of brown, and five species of green algae (Table 1 and S2 Table). The  
256 most common green macroalgae associated with *G. divaricata* were *Derbesia marina*  
257 (occurrence frequency: 37%) (Fig. 6A), *Caulerpa chemnitzia* (27%) (Fig 6B), and  
258 *Boodlea composita* (20%). The most common brown macroalgae associated with *G.*  
259 *divaricata* were the brown algae *Lobophora* sp. (as *Lobophora* sp28 in [32]) (57%),  
260 *Padina* sp. (as *Padina* sp5 in [33]) (53%), and *Dictyota bartayresiana* (30%) (Fig 6C).  
261 The most common red macroalgae associated with *G. divaricata* were *Hypnea*  
262 *caespitosa* (100%) (Fig 6D), *Coelothrix irregularis* (87%), *Ceramium dawsoniia*  
263 (43%). Lastly, epiphytic macroscopic cyanobacteria (> 1cm in height) had an  
264 occurrence frequency of 17%. Among these epiphytic macroalgae we observed that

265 the allelopathic *Lobophora* (identified as *Lobphora* sp28; S2 Table) was also found to  
266 frequently overgrow corals in the Dongsha lagoon (Fig 7 and S2 Fig).

267

## 268 **Discussion**

269 Our study shows that most patch reefs in the lagoon of Dongsha Atoll are  
270 degraded. Many reefs have a low live coral cover (below 25%) and high proportions  
271 of macroalgae, dead corals, and rubble, all of which are signs of reef degradation [34].  
272 This is consistent with previous surveys that reported degraded conditions of lagoon  
273 patch reefs at Dongsha [35,36]. The filamentous form of *Galaxaura divaricata*  
274 overgrows degraded patch reefs in the southeast lagoon. This area is sheltered by a 2  
275 km-wide reef flat, harboring shallow (1-5 m) and calm waters that may provide  
276 suitable growth conditions for *G. divaricata*. The proliferation of macroalgae is likely  
277 the consequence of an initial coral decline [37,38]. The synergistic effects of thermal  
278 stress, overfishing, and typhoon damage may have caused the decline of the once  
279 pristine corals in the Dongsha lagoon, followed by a proliferation of *G. divaricata*,  
280 among other macroalgae. Thermal stress on corals has increased over the past decades,  
281 with waters surrounding Dongsha Atoll warming at a faster rate than other areas of  
282 the South China Sea [35,39,40]. Recurrent bleaching events have caused high coral

283 mortality and eradicated thermo-sensitive coral genera from the lagoon [41].  
284 Overfishing and the extensive use of dynamite and cyanide, prior to the establishment  
285 of the Dongsha Atoll National Park in 2007 reduced fish, and destroyed large areas of  
286 coral framework [20,42]. Insufficient grazing after disturbance can lead to the  
287 establishment and full outgrowth of macroalgae beyond their initial stages [43].  
288 *Galaxaura* is known to be largely unpalatable for various herbivorous fishes due to its  
289 calcareous thallus and low nutritional content [44-46]. Local herbivorous fish  
290 population in the Dongsha lagoon may not be effective to control the outgrowth of  
291 *Galaxaura* in certain areas.

292         Semi-closed lagoons are highly vulnerable to eutrophication and hypoxia,  
293 especially under the backdrop of climate change [47,48]. Reoccurring events of  
294 hypoxia during hot summers in 2014 and 2015 have caused substantial mass-die offs  
295 of the coral associated fauna and flora in the Dongsha lagoon [49]. Particularly,  
296 densities of macroinvertebrates, including echinoids, sea cucumbers, lobsters, and  
297 giant clams are extremely low (Table S4). *Galaxaura* appears to be well adapted to  
298 hypoxic conditions. For instance, *G. filamentosa* was one of the few algae to  
299 proliferate after a mass-die off caused by hypoxia in an atoll lagoon in French  
300 Polynesia [50].

301           Although the filamentous *G. divaricata* is a common allelopathic seaweed in  
302   subtropical and tropical waters, it has never been reported as a nuisance in  
303   overgrowing coral reefs. Our observations are the first to report a prolonged *G.*  
304   *divaricata* overgrowth in degraded coral reefs. For instance, the *G. divaricata* cover  
305   was equally high on a degraded reef after 17-months. We further provide photo-  
306   evidence from another patch reef showing that the same *G. divaricata* overgrowth  
307   was present to a similar extent after 3.5 years. The photos clearly show that *G.*  
308   *divaricata* dominated the reef substrate of the site in both, the cooler northeast  
309   monsoon (winter) season (Fig 5.A, water temperature: 22.5°C), and the warmer  
310   southwest monsoon (summer) season (Fig 5.B, water temperature: 29°C). Due to  
311   challenging weather conditions, we were only able to conduct our quantitative  
312   temporal survey in April, the last month of the winter season, and therefore we cannot  
313   rule out potential variations in *G. divaricata* cover over the full length of that season.  
314   Expanding temporal surveys in the future will be worth of doing to confirm the long-  
315   term persistence of *G. divaricata* overgrowth.

316           A prolonged overgrowth of filamentous *G. divaricata* may have profound  
317   implications for the recovery potential of degraded reefs at Dongsha Atoll. Owing to  
318   its allelopathic effects on corals long-standing canopies of *G. divaricata* are likely to  
319   hamper coral recruitment ultimately preventing coral recovery [15,51]. As a caveat of

320 this study, it is important to note that we did not attempt to isolate and identify  
321 allelopathic chemicals in *G. divaricata*. But, previous studies have identified lipid-  
322 soluble terpenoid compounds from filamentous *Galaxaura* cell extracts as  
323 allelochemicals that were capable of bleaching and killing of coral tissue [13]. It is  
324 also known that *Galaxaura* can change the chemical microclimate on degraded reefs  
325 with adverse effects on fish feeding behavior [4]. For instance, butterflyfish and other  
326 corallivores avoid corals in close association with *Galaxaura*, making it potentially  
327 difficult for these trophic guilds to find food [52,53]. Unlike other calcifying algae,  
328 such as coralline algae, *Galaxaura* does not stabilize the reef matrix. Thus, a  
329 prolonged *Galaxaura* overgrowth may contribute to the erosion and flattening of the  
330 reef structure, which negatively impacts biodiversity, and trophic support for coral  
331 associated organisms [54].

332         The filamentous *G. divaricata* is used as habitat by a variety of macroalgae.  
333 The availability of new habitat for epiphytic macroalgae provided by a prolonged  
334 *Galaxaura* overgrowth could have several implications for the ecology and recover  
335 potential of the reef. For instance, nutrient rich epiphytes could provide trophic  
336 support for herbivorous fishes and invertebrate, such as crustaceans and mollusks  
337 [24,55,56]. On the other hand, the association with the unpalatable *Galaxaura* may  
338 provide a refuge from herbivory for certain palatable algae [38,57], and facilitate their

339 establishment on the reef, increasing macroalgae biodiversity [58]. The facilitation of  
340 harmful, allelopathic algal types could decrease the resilience and promote alternative  
341 stable states on coral reefs [59]. Some of the identified *G. divaricata* epiphytes, such  
342 as cyanobacteria [10], *Dictyota* [60], and *Lobophora* [9,61] are widely shown to  
343 overgrow corals after disturbance, and are known for their allelopathic inhibition of  
344 coral larvae recruitment. Here, we firstly report that an undescribed species  
345 *Lobophora* sp. (as *Lobophora* sp28 in [32]), the third most abundant macroalga on *G.*  
346 *divaricata*, overgrows and kills corals in the Dongsha lagoon through epizoism (Fig 7  
347 and S2). Moreover, the microscopic filaments of *G. divaricata* may facilitate the  
348 attachment of macroalgae spores, while the calcified branches may provide structural  
349 support for fine, filamentous macroalgae. Considering that an increased substrate  
350 availability can promote macroalgae biomass on coral reefs, we hypothesize that, by  
351 providing a habitat for epiphytic macroalgae, *G. divaricata* may facilitate the diversity  
352 and abundance of macroalgae on degraded reefs. This study is merely observational  
353 and does not provide experimental evidence for the facilitation of macroalgae  
354 diversity and abundance by *G. divaricata*. However, the abovementioned hypotheses  
355 would be of great interest awaiting future validation.

356

## 357 **Conclusions**

358 Our observations illustrated that the allelopathic and unpalatable filamentous  
359 seaweed, *Galaxaura divaricata*, can become dominant on degraded reefs in shallow,  
360 sheltered, and calm environments. We show that *G. divaricata* provides suitable  
361 substrate for a variety of macroalgae, further facilitating macroalgae growth and  
362 abundance on degraded reefs. Thus, a prolonged proliferation of *Galaxaura* could  
363 potentially enhance negative feedback loops, thereby perpetuating reef degradation.  
364 Several common epiphytic macroalgae on *Galaxaura* are allelopathic and known to  
365 frequently overgrow corals. Macroalgal assemblages, such as the *Galaxaura*-epiphyte  
366 system, warrant further investigation to better understand their ecological implications  
367 on the resilience of coral reefs, especially of shallow atoll lagoons. There are 439  
368 listed coral reef atolls on earth; among them are 335 with semi-enclosed lagoons [62].  
369 Atoll lagoons are highly productive and serve as valuable nursery habitat for marine  
370 life; however, they are most vulnerable to the effects of climate change [48,63].  
371 Results from our study can be informative for the management and conservation of  
372 lagoons and shallow, inshore coral reef ecosystems, especially in the South China Sea  
373 and the Pacific Ocean, where filamentous *Galaxaura* is very common.

374

### 375 **Acknowledgements**

376 The authors would like to thank our colleagues of the joint project: “Patterns  
377 of Resilience in Dongsha Atoll Coral Reefs” for their collaboration and great support



378 throughout this study. We thank Keryea Soong and staff of the Dongsha Atoll  
379 Research Station, the Dongsha Atoll National Park, the Coastal Guard Administration,  
380 and the Ministry of Marine Affairs for logistic support. We would like to thank  
381 George P. Lohmann and Cherng-Shyang Chang for assistance with benthic surveys,  
382 as well as Chieh-Hsuan Lee and Pin-Chen Chen for assistance with fieldwork and  
383 DNA barcoding.

384

### 385 **Author contributions**

386 **Conceptualization:** Carolin Nieder, Shao-Lun Liu.

387 **Formal analysis:** Carolin Nieder, Shao-Lun Liu.

388 **Investigation:** Carolin Nieder.

389 **Writing—original draft:** Carolin Nieder, Chaolun Allen Chen, Shao-Lun Liu.

390 **Writing—review & editing:** Carolin Nieder, Chaolun Allen Chen, Shao-Lun Liu.

391

### 392 **References**

393 1. McCook L, Jompa J, Diaz-Pulido G. Competition between corals and algae on  
394 coral reefs: a review of evidence and mechanisms. *Coral Reefs*. 2001;19: 400-417.

395 2. Hughes TP, Rodrigues MJ, Bellwood DR, Ceccarelli D, Hoegh-Guldberg O,  
396 McCook L, et al. Phase shifts, herbivory, and the resilience of coral reefs to climate  
397 change. *Curr Bio*. 2007;17: 360-365.

- 398 3. Birrell CL, McCook LJ, Willis BL, Diaz-Pulido GA. Effects of benthic algae on the  
399 replenishment of corals and the implications for the resilience of coral reefs.  
400 *Oceanogr Mar Biol Annu Rev.* 2008;46: 25-63.
- 401 4. McCormick MI, Barry RP, Allan BJ. Algae associated with coral degradation  
402 affects risk assessment in coral reef fishes. *Sci Rep.* 2017;7: 16937.
- 403 5. Rasher DB, Stout EP, Engel S, Kubanek J, Hay ME. Macroalgal terpenes function  
404 as allelopathic agents against reef corals. *Proc Natl Acad Sci.* 2011;108: 17726-17731.
- 405 6. Andras TD, Alexander TS, Gahlana A, Parry RM, Fernandez FM, Kubanek J, et al.  
406 Seaweed allelopathy against coral: surface distribution of a seaweed secondary  
407 metabolite by imaging mass spectrometry. *J Chem Ecol.* 2012;38: 1203-1214.
- 408 7. Nugues MM, Smith GW, Hooidonk RJ, Seabra MI, Bak RP. Algal contact as a  
409 trigger for coral disease. *Ecol Lett.* 2004;7: 919-923.
- 410 8. Thurber RV, Burkepile DE, Correa AM, Thurber AR, Shantz AA, Welsh R, et al.  
411 Macroalgae decrease growth and alter microbial community structure of the reef-  
412 building coral, *Porites astreoides*. *PLoS One.* 2012;7: e44246.
- 413 9. Morrow KM, Bromhall K, Motti CA, Munn CB, Bourne DG. Allelochemicals  
414 produced by brown macroalgae of the *Lobophora* genus are active against coral larvae  
415 and associated bacteria, supporting pathogenic shifts to vibrio dominance. *Appl*  
416 *Environ Microbiol.* 2016;83: 10.1128.
- 417 10. Kuffner IB, Walters LJ, Becerro MA, Paul VJ, Ritson-Williams R, Beach KS.  
418 Inhibition of coral recruitment by macroalgae and cyanobacteria. *Mar Ecol Prog Ser.*  
419 2006;323: 107-117.
- 420 11. Webster FJ, Babcock RC, Van Keulen M, Loneragan NR. Macroalgae inhibits  
421 larval settlement and increases recruit mortality at Ningaloo Reef, Western Australia.  
422 *PloS One.* 2015;10: e0124162.
- 423 12. Liu S, Liao LM, Wang W. Conspicuity of two morphologically distinct  
424 calcified red algae from the northwest Pacific Ocean: *Galaxaura pacifica* and *G.*  
425 *filamentosa* (Galaxauraceae, Rhodophyta). *Bot Stud.* 2013;54: 1.
- 426 13. Rasher DB, Stout EP, Engel S, Kubanek J, Hay ME. Macroalgal terpenes function  
427 as allelopathic agents against reef corals. *Proc Natl Acad Sci.* 2011;108: 17726-17731.

- 428 14. Rasher DB, Hay ME. Chemically rich seaweeds poison corals when not controlled  
429 by herbivores. *Proc Natl Acad Sci.* 2010;107: 9683-9688.
- 430 15. Dixson DL, Abrego D, Hay ME. Reef ecology. Chemically mediated behavior of  
431 recruiting corals and fishes: a tipping point that may limit reef recovery. *Science.*  
432 2014;345: 892-897.
- 433 16. Rasher DB, Hay ME. Seaweed allelopathy degrades the resilience and function of  
434 coral reefs. *Commun Integr Biol.* 2010;3: 564-566.
- 435 17. Wendy Guiry in Guiry, M.D. & Guiry, G.M. Algaebase. World-wide electronic  
436 publication, National University of Ireland, Galway. Searched on 13 December 2018.  
437 Algaebase. 2018. Available: <http://www.algaebase.org>.
- 438 18. Wang WL, Liu SL, Li TH. Seaweeds of Dongsha Atoll in the South China Sea.  
439 Kaohsiung, Taiwan: Marine National Park Headquarters; 2015.
- 440 19. Huang D, Licuanan WY, Hoeksema BW, Chen CA, Ang PO, Huang H, et al.  
441 Extraordinary diversity of reef corals in the South China Sea. *Mar Biodivers.* 2015;45:  
442 157-168.
- 443 20. Dai C. Dongsha Atoll in the South China Sea: Past, present and future. Islands of  
444 the World VIII International Conference “Changing Islands – Changing Worlds” 1-7  
445 November 2004, Kinmen Island (Quemoy), Taiwan.
- 446 21. DeCarlo TM, Cohen AL, Wong GT, Davis KA, Lohmann P, Soong K. Mass coral  
447 mortality under local amplification of 2° C ocean warming. *Sci Rep.* 2017;7: 44586.
- 448 22. Fricke A, Titlyanova T, Nugues M, Bischof K. Depth-related variation in  
449 epiphytic communities growing on the brown alga *Lobophora variegata* in a  
450 Caribbean coral reef. *Coral Reefs.* 2011;30: 967-973.
- 451 23. Prince JS, O'Neal SW. The ecology of *Sargassum pteropleuron* Grunow  
452 (Phaeophyceae, Fucales) in the waters off South Florida: I. Growth, reproduction and  
453 population structure. *Phycologia.* 1979;18: 109-114.
- 454 24. Bittick SJ, Clausing RJ, Fong CR, Scoma SR, Fong P. A Rapidly Expanding  
455 Macroalga Acts as a Foundational Species Providing Trophic Support and Habitat in  
456 the South Pacific. *Ecosystems.* 2018: 1-9.

- 457 25. Wang B, Zhang Y, Lu M. Definition of South China Sea monsoon onset and  
458 commencement of the East Asia summer monsoon. *J Clim.* 2004;17: 699-710.
- 459 26. Chou Y. Dongsha Atoll Research Station-A steady research platform in South  
460 China Sea. *Kuroshio Science.* 2016; 10-1: 23-27.
- 461 27. Connell S, Foster M, Airoidi L. What are algal turfs? Towards a better description  
462 of turfs. *Mar Ecol Prog Ser.* 2014;495: 299-307.
- 463 28. Preskitt LB, Vroom PS, Smith CM. A rapid ecological assessment (REA)  
464 quantitative survey method for benthic algae using photo-quadrats with scuba. *Pac Sci.*  
465 2004;58: 201-209.
- 466 29. Freshwater DW, Rueness J. Phylogenetic relationships of some European  
467 *Gelidium* (Gelidiales, Rhodophyta) species, based on *rbcL* nucleotide sequence  
468 analysis. *Phycologia.* 1994;33: 187-194.
- 469 30. Draisma SG, Prud'Homme van Reine, Willem F, Stam WT, Olsen JL. A  
470 reassessment of phylogenetic relationships within the Phaeophyceae based on  
471 RUBISCO large subunit and ribosomal DNA sequences. *J Phycol.* 2001;37: 586-603.
- 472 31. Famà P, Wysor B, Kooistra WH, Zuccarello GC. Molecular phylogeny of the  
473 genus *Caulerpa* (Caulerpales, Chlorophyta) inferred from chloroplast *tufA* gene1. *J*  
474 *Phycol.* 2002;38: 1040-1050.
- 475 32. Vieira C, Camacho O, Sun Z, Fredericq S, Leliaert F, Payri C, et al. Historical  
476 biogeography of the highly diverse brown seaweed *Lobophora* (Dictyotales,  
477 Phaeophyceae). *Mol Phylogenet Evol.* 2017;110: 81-92.
- 478 33. Silberfeld T, Bittner L, Fernández-García C, Cruaud C, Rousseau F, de Reviers B,  
479 et al. Species diversity, phylogeny and large scale biogeographic patterns of the genus  
480 *Padina* (Phaeophyceae, Dictyotales). *J Phycol.* 2013;49: 130-142.
- 481 34. Gomez, ED, Yap HT. Monitoring reef condition. In: Kenchington RA, Hudson ET.  
482 editors. *Coral Reef Management Handbook*, UNESCO Regional Office for Science  
483 and Technology for Southeast Asia (ROSTSEA); 1988. pp. 171-178.
- 484 35. Tkachenko KS, Soong K. Dongsha Atoll: A potential thermal refuge for reef-  
485 building corals in the South China Sea. *Mar Environ Res.* 2017;127: 112-125.

- 486 36. Morton B. Dongsha Atoll, South China Sea: Ground Zero! *Mar Pollut Bull.*  
487 2002;44: 835-837.
- 488 37. Diaz-Pulido G, McCook LJ, Dove S, Berkelmans R, Roff G, Kline DI, et al.  
489 Doom and boom on a resilient reef: climate change, algal overgrowth and coral  
490 recovery. *PloS One.* 2009;4: e5239.
- 491 38. Roff G, Doropoulos C, Zupan M, Rogers A, Steneck RS, Golbuu Y, et al. Phase  
492 shift facilitation following cyclone disturbance on coral reefs. *Oecologia.* 2015;178:  
493 1193-1203.
- 494 39. DeCarlo TM, Karnauskas KB, Davis KA, Wong GT. Climate modulates internal  
495 wave activity in the Northern South China Sea. *Geophys Res Lett.* 2015;42: 831-838.
- 496 40. Zuo X, Su F, Wu W, Chen Z, Shi W. Spatial and temporal variability of thermal  
497 stress to China's coral reefs in South China Sea. *Chinese Geogr Sci.* 2015;25: 159-  
498 173.
- 499 41. Li J, Lee T, Tew KS, Fang L. Changes in the coral community at Dongsha Atoll,  
500 South China Sea from 1975 to 1998. *Acta Zoologica Taiwanica.* 2000;11: 1-15.
- 501 42. Morton B, Blackmore G. South China Sea. *Mar Pollut Bull.* 2001;42: 1236-1263.
- 502 43. Bozec Y, Doropoulos C, Roff G, Mumby PJ. Transient grazing and the dynamics  
503 of an unanticipated coral-algal phase shift. *Ecosystems.* 2018: 1-16.
- 504 44. Mantyka CS, Bellwood DR. Macroalgal grazing selectivity among herbivorous  
505 coral reef fishes. *Mar Ecol Prog Ser.* 2007;352: 177-185.
- 506 45. Rasher DB, Hoey AS, Hay ME. Consumer diversity interacts with prey defenses  
507 to drive ecosystem function. *Ecology.* 2013;94: 1347-1358.
- 508 46. Duffy JE, Hay ME. Herbivore resistance to seaweed chemical defense: the roles  
509 of mobility and predation risk. *Ecology.* 1994;75: 1304-1319.
- 510 47. Charpy L, Dufour P, Garcia N. Particulate organic matter in sixteen Tuamotu atoll  
511 lagoons (French Polynesia). *Mar Ecol Prog Ser.* 1997: 55-65.
- 512 48. Andréfouët S, Dutheil C, Menkes CE, Bador M, Lengaigne M. Mass mortality  
513 events in atoll lagoons: environmental control and increased future vulnerability.  
514 *Global Change Biol.* 2015;21: 195-205.

- 515 49. Gajdzik L, DeCarlo TM. The perfect calm: Reoccurring mass die-offs on a remote  
516 coral atoll. *Matters*. 2017;3: e201707000003.
- 517 50. Adjeroud M, Andréfouët S, Payri C. Mass mortality of macrobenthic communities  
518 in the lagoon of Hikueru atoll (French Polynesia). *Coral Reefs*. 2001;19: 287-291.
- 519 51. Bonaldo RM, Hay ME. Seaweed-coral interactions: variance in seaweed  
520 allelopathy, coral susceptibility, and potential effects on coral resilience. *PloS One*.  
521 2014;9.
- 522 52. Brooker RM, Brandl SJ, Dixson DL. Cryptic effects of habitat declines: coral-  
523 associated fishes avoid coral-seaweed interactions due to visual and chemical cues.  
524 *Sci Rep*. 2016;6: 18842.
- 525 53. Brooker RM, Sih TL, Dixson DL. Contact with seaweed alters prey selectivity in  
526 a coral-feeding reef fish. *Mar Ecol Prog Ser*. 2017;580: 239-244.
- 527 54. Alvarez-Filip L, Dulvy NK, Gill JA, Cote IM, Watkinson AR. Flattening of  
528 Caribbean coral reefs: region-wide declines in architectural complexity. *Proc Biol Sci*.  
529 2009;276: 3019-3025.
- 530 55. Thomsen MS, Hildebrand T, South PM, Foster T, Siciliano A, Oldach E, et al. A  
531 sixth-level habitat cascade increases biodiversity in an intertidal estuary. *Ecol Evol*.  
532 2016;6: 8291-8303.
- 533 56. Marzinelli EM, Burrows MT, Jackson AC, Mayer-Pinto M. Positive and negative  
534 effects of habitat-forming algae on survival, growth and intra-specific competition of  
535 limpets. *PloS One*. 2012;7: e51601.
- 536 57. Loffler Z, Bellwood D, Hoey A. Associations among coral reef macroalgae  
537 influence feeding by herbivorous fishes. *Coral Reefs*. 2015;34: 51-55.
- 538 58. Hay ME. Associational plant defenses and the maintenance of species diversity:  
539 turning competitors into accomplices. *Am Nat*. 1986;128: 617-641.
- 540 59. Briggs CJ, Adam TC, Holbrook SJ, Schmitt RJ. Macroalgae size refuge from  
541 herbivory promotes alternative stable states on coral reefs. *PloS One*. 2018;13:  
542 e0202273.
- 543 60. Paul VJ, Kuffner IB, Walters LJ, Ritson-Williams R, Beach KS, Becerro MA.  
544 Chemically mediated interactions between macroalgae *Dictyota* spp. and multiple

545 life-history stages of the coral *Porites astreoides*. Mar Ecol Prog Ser. 2011;426: 161-  
546 170.

547 61. Vieira C, Thomas OP, Culioli G, Genta-Jouve G, Houlbreque F, Gaubert J, et al.  
548 Allelopathic interactions between the brown algal genus *Lobophora* (Dictyotales,  
549 Phaeophyceae) and scleractinian corals. Sci Rep. 2016;6: 18637.

550 62. Goldberg W. Atolls of the world: revisiting the original checklist. Atoll Res Bull  
551 No. 610. Washington, D.C.: Smithsonian Institution Scholarly Press; 2016.

552 63. Altieri AH, Gedan KB. Climate change and dead zones. Global Change Biol.  
553 2015;21: 1395-1406.

554

555 **Table 1. Occurrence frequency (%) of epiphytic macroalgae on *Galaxaura divaricata***  
 556 **from the slope area of site 7.**

| <b>Epiphyte taxon</b>                                                       | <b>Phylum</b> | <b>Occurrence frequency (%)</b> |
|-----------------------------------------------------------------------------|---------------|---------------------------------|
| <i>Acanthophora spicifera</i> <sup>a</sup>                                  | Red           | 3                               |
| <i>Ceramium dawsonii</i> (MH048927) <sup>b</sup>                            | Red           | 43                              |
| <i>Coelothrix irregularis</i> (MH048928)                                    | Red           | 87                              |
| <i>Dichotomaria obtusata</i>                                                | Red           | 3                               |
| Gelidiales                                                                  | Red           | 27                              |
| <i>Gracilaria</i> spp.                                                      | Red           | 7                               |
| <i>Hypnea caespitosa</i> (MH048929, MH048930, MH048931)                     | Red           | 100                             |
| <i>Hypnea</i> sp. (MH048932)                                                | Red           | 30                              |
| <i>Laurencia dendroidea</i>                                                 | Red           | 13                              |
| <i>Laurencia</i> spp.                                                       | Red           | 20                              |
| <i>Dictyota bartayresiana</i>                                               | Brown         | 30                              |
| <i>Dictyota</i> spp.                                                        | Brown         | 13                              |
| <i>Lobophora</i> sp28 <sup>c</sup> (MH048934, MH048935, MH048936, MH048937) | Brown         | 57                              |
| <i>Padina</i> sp5 <sup>d</sup> (MH048933)                                   | Brown         | 53                              |
| <i>Sargassum</i> spp.                                                       | Brown         | 3                               |
| <i>Boodlea composita</i>                                                    | Green         | 20                              |
| <i>Caulerpa chemnitzia</i> (MH048959)                                       | Green         | 27                              |
| <i>Derbesia marina</i>                                                      | Green         | 37                              |
| <i>Phyllocladon anastomosans</i>                                            | Green         | 10                              |
| <i>Valonia ventricosa</i>                                                   | Green         | 10                              |
| Cyanobacteria (filamentous > 1cm)                                           | Cyanobacteria | 17                              |

557 <sup>a</sup>Identification of species and taxonomic groups according to [18].

558 <sup>b</sup>GenBank number in parentheses based on species identifications through DNA barcoding.

559 <sup>c</sup>Denomination according to [32].

560 <sup>d</sup>Denomination according to [33].



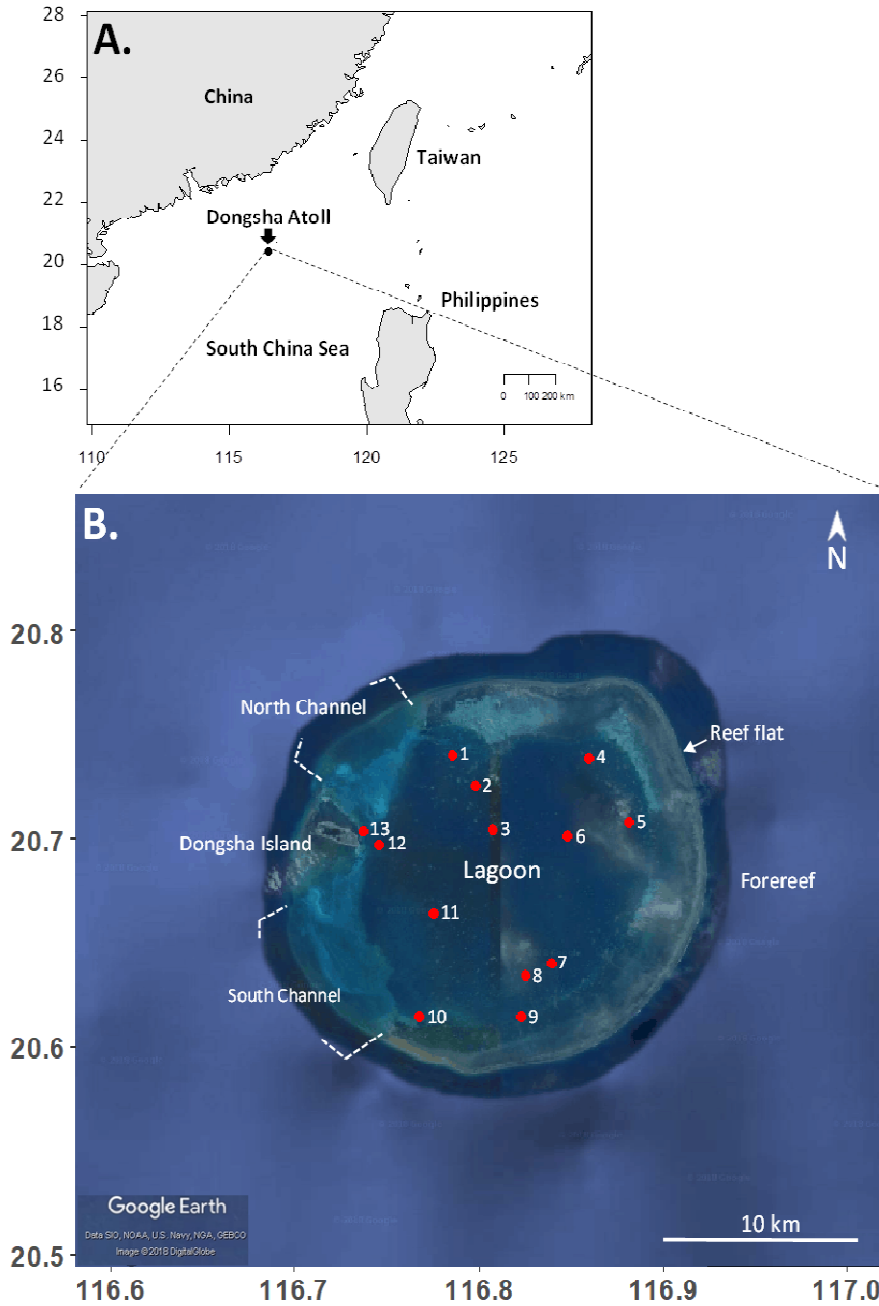

561

562 **Fig 1. Study site.** A) Geographical location of Dongsha Atoll in the northern South

563 China Sea. B) Lagoon patch reef sites surveyed in this study.

564

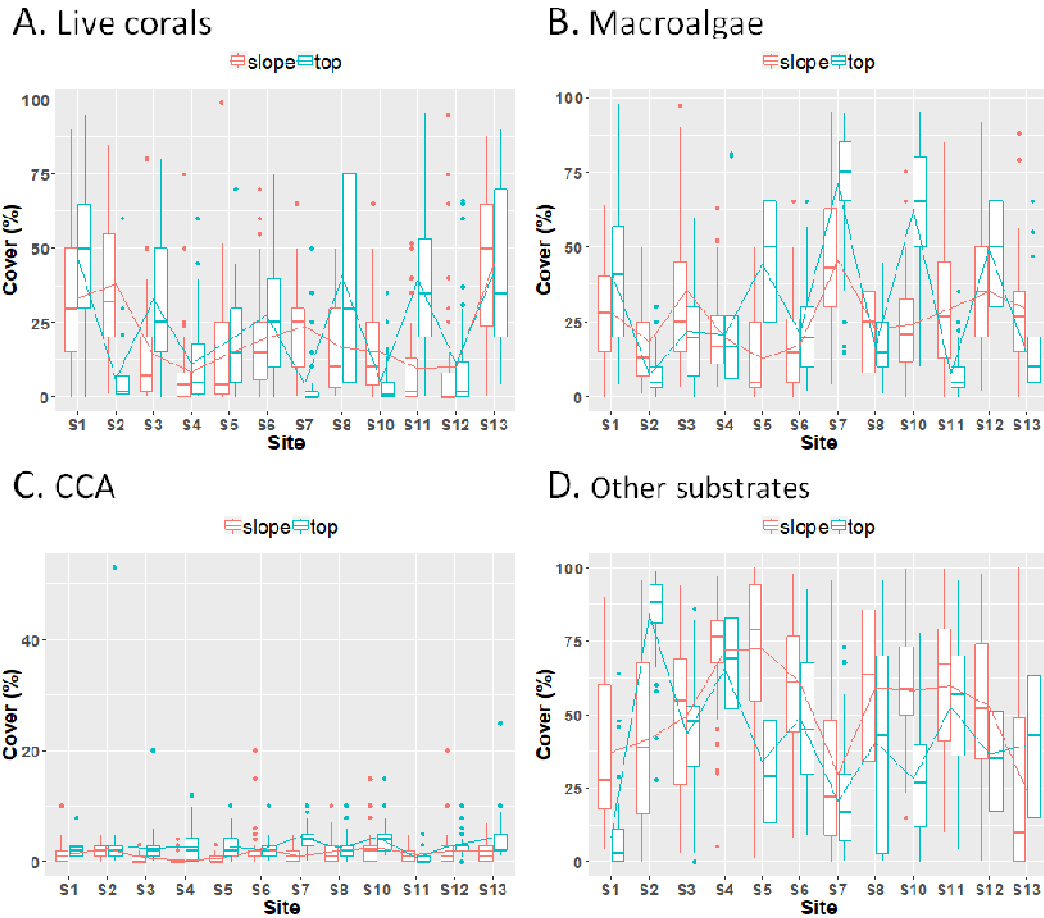

565

566 **Fig 2. Spatial variation in benthic categories in the Dongsha lagoon.** Variation in

567 the cover of (A) live corals, (B) total macroalgae (upright and crustose non-coralline

568 seaweeds, and turf), (C) crustose coralline algae (CCA), and (D) other substrates

569 (dead coral skeletons, rubble, and rocks) between two reef areas (top and slope)

570 among 12 sites.

571

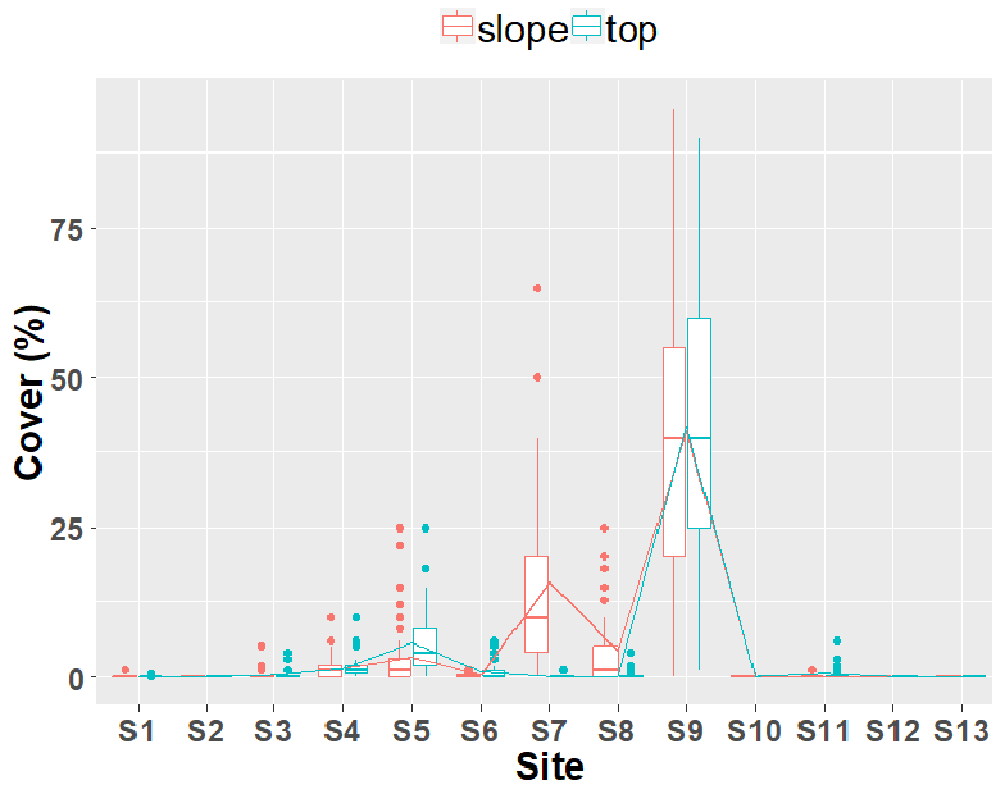

572

573 **Fig 3. Spatial variation in *G. divaricata* in the Dongsha lagoon.** Variation in the

574 cover of *G. divaricata* between two reef areas (top and slope) among 13 sites.

575

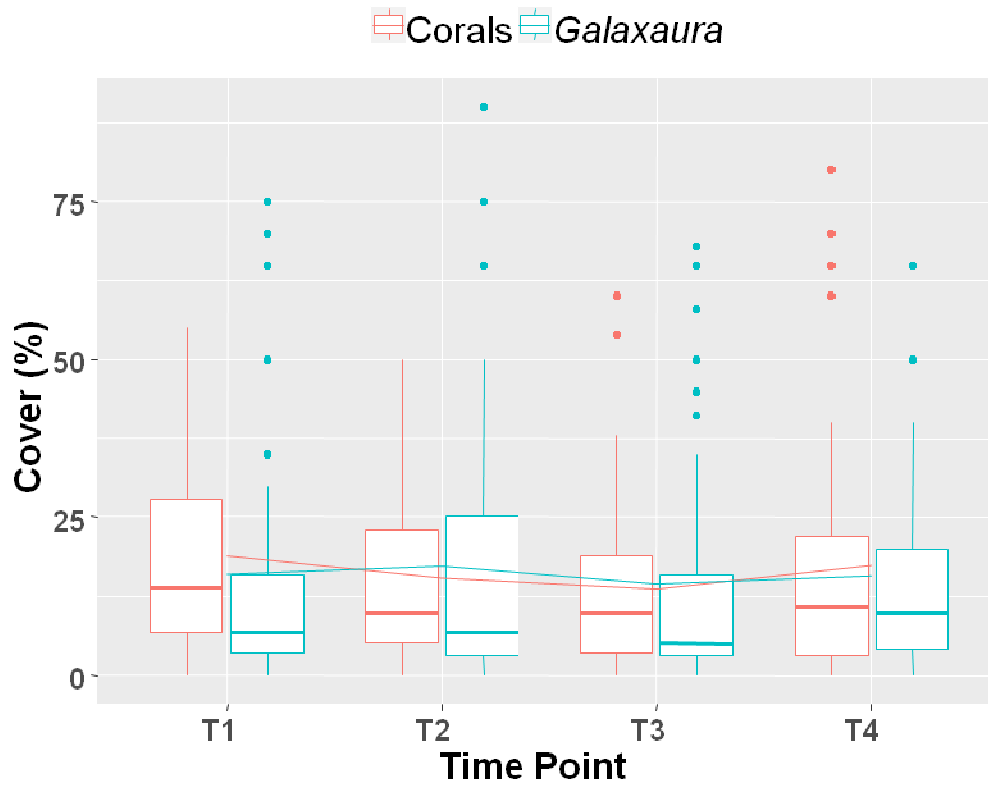

576

577 **Fig 4. Temporal variation in *G. divaricata* on a degraded patch reef in the**

578 **southeast Dongsha lagoon.** Variation in the percent cover of two major benthic

579 categories (live corals and *G. divaricata*) among four time points (T1: April 2016, T2:

580 July 2016, T3: September 2016, and T4: September 2017) over a period of 17 months

581 (about 5 m depth at site 7).

582

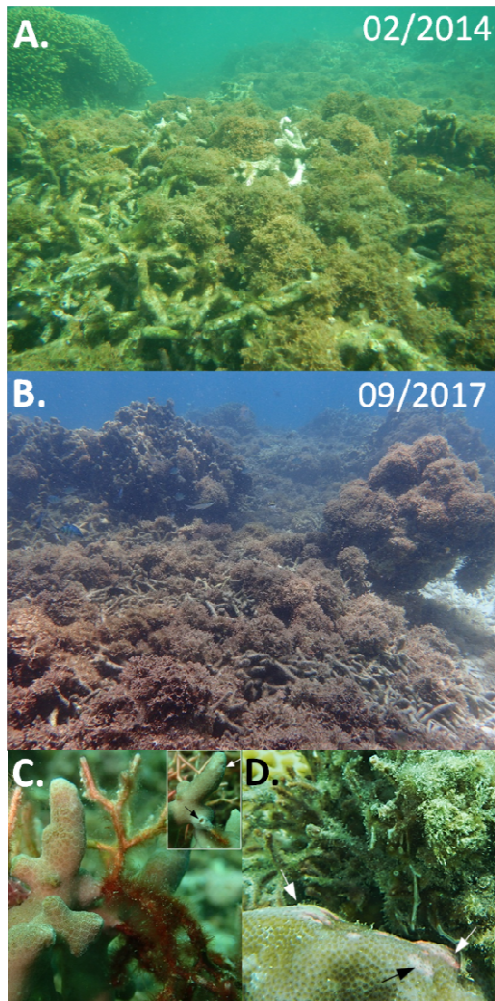

583

584 **Fig 5. Observational photo-evidence of a prolonged *Galaxaura* overgrowth. A-B)**

585 A degraded patch reef in the southeast lagoon of Dongsha Atoll has been overgrown

586 by *G. divaricata* for at least 3.5 years (3-5 m depth at site 9). Photos were taken in A)

587 February 2014, with water temperature = 22.5°C; and B) in September 2017 with

588 water temperature = 29°C. The holdfast of *G. divaricata* penetrates a branching

589 *Porites* coral (*P. cylindrica*), creating small holes (inset). D) Coral (*P. solida*) tissue

590 discoloration and bleaching (arrows) following direct contact with *G. divaricata*,

591 potentially caused by allelopathic chemicals.

592

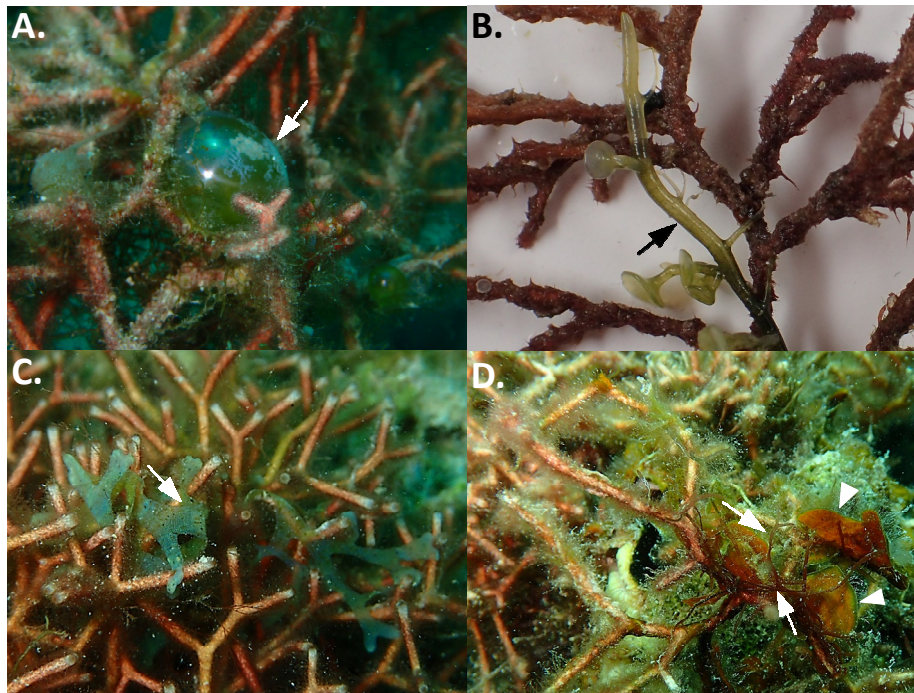

593

594 **Fig 6. Examples showing epiphytic macroalgae that frequently grow on *G.***

595 *divaricata*. A) *Valonia ventricosa*, B) *Caulerpa chemnitzia*, C) *Dictyota* sp., D)

596 *Lobophora* sp. (arrowhead), and *Hypnea caespitosa* (arrow).

597



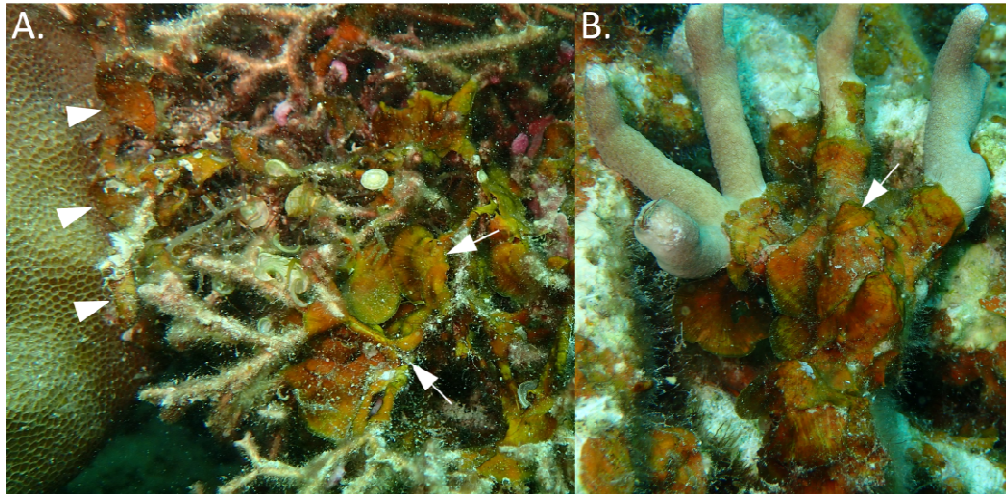

598

599 **Fig 7. Coral overgrowth by *Lobophora* sp28.** A) Example showing *Lobophora* sp28

600 growing on *Galaxaura divaricata* (arrows), and in contact with coral (*Porites solida*)

601 (arrowheads). B) Coral overgrowth (*Porites cylindrica* in this case) by *Lobophora*

602 sp28 is widespread in the shallow lagoon of Dongsha Atoll.

603

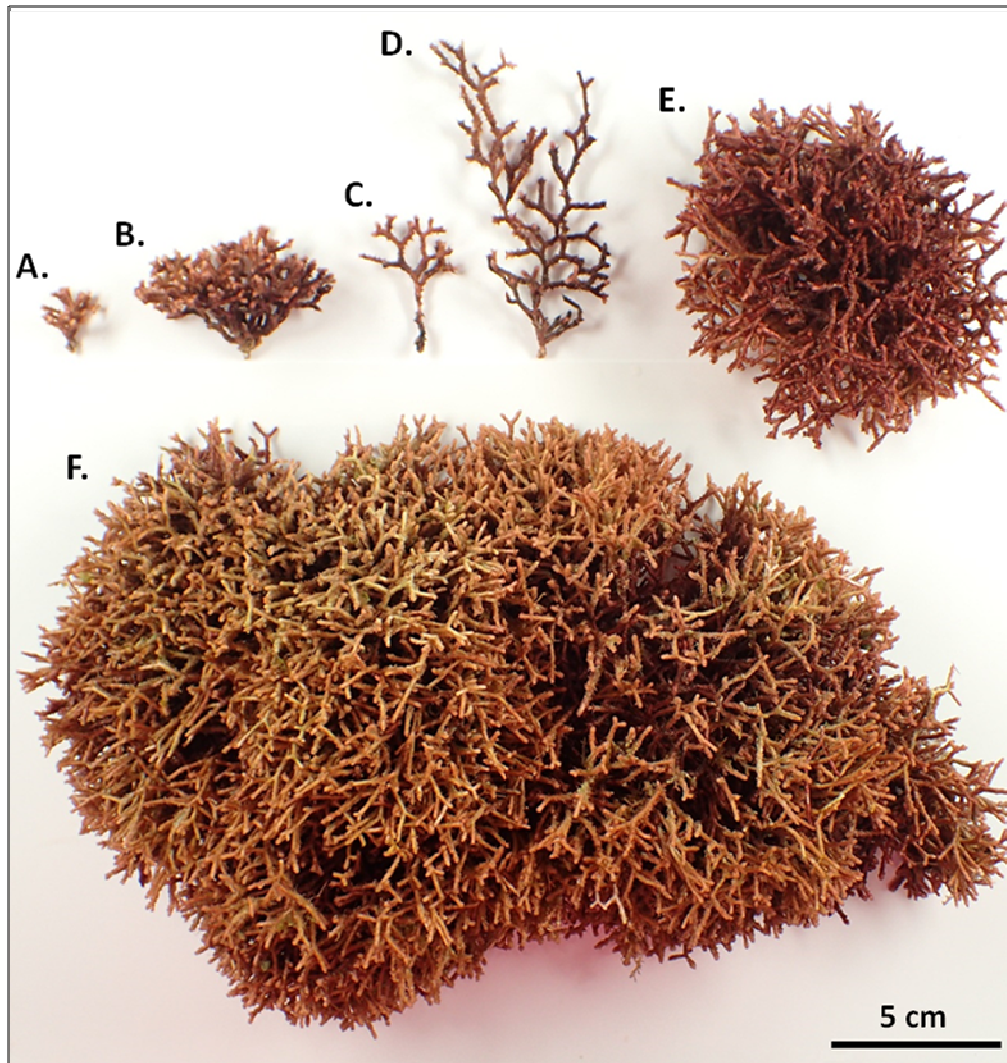

604

605 **S1 Fig. Various sizes and thallus shapes of *Galaxaura divaricata* from different**

606 **locations in the lagoon of Dongsha Atoll. A-B) Small, ball-shaped thalli, and C-D)**

607 **small, slender thalli were dominant on patch reefs in the north and northeast lagoon. E)**

608 **Medium, ball-shaped thalli, and F) large carpet-like thalli were exclusively present in**

609 **the southeast section of the lagoon.**

610



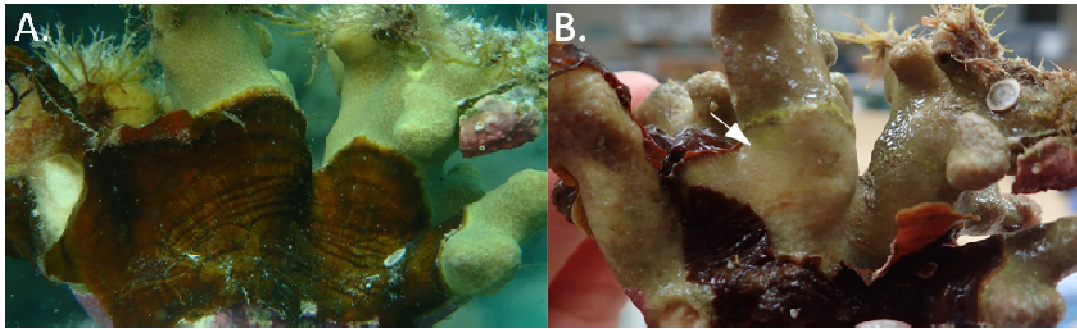

611

612 **S2 Fig. Coral overgrowth by *Lobophora* sp28.** A) Coral overgrowth (*Porites*

613 *cylindrica* in this case) by *Lobophora* sp28 is wide spread in the lagoon of Dongsha

614 Atoll. B) The same coral showing dead tissue (arrow) after the removal of the algae.

615

616 **S1 Table. GPS coordinates of patch reef survey sites in the lagoon of Dongsha Atoll,**  
617 **South China Sea (Taiwan).**

| Site | Latitude     | Longitude      |
|------|--------------|----------------|
| 1    | 20°44'26.28" | 116°47'8.879"  |
| 2    | 20°43'31.62" | 116°47'52.679" |
| 3    | 20°42'16.14" | 116°48'27.419" |
| 4    | 20°44'20.52" | 116°51'35.699" |
| 5    | 20°42'29.88" | 116°52'54.599" |
| 6    | 20°42'6.72"  | 116°50'53.279" |
| 7    | 20°38'24"    | 116°50'20.999" |
| 8    | 20°38'3.12"  | 116°49'30.479" |
| 9    | 20°36'52.86" | 116°49'24.179" |
| 10   | 20°36'53.4"  | 116°46'2.399"  |
| 11   | 20°39'52.2"  | 116°46'32.159" |
| 12   | 20°41'49.2"  | 116°44'45.659" |
| 13   | 20°42'12.36" | 116°44'14.639" |

618

619

620 **S2 Table. Information and Genbank numbers of macroalgae samples used for DNA barcoding in this study.**

| Species                            | Phylum | Voucher# | Date   | Site | Area  | Substrate            | Marker      | GenBank# |
|------------------------------------|--------|----------|--------|------|-------|----------------------|-------------|----------|
| <i>Ceramium dawsonii</i>           | Red    | KO208    | Oct-16 | 7    | slope | <i>G. divaricata</i> | <i>rbcL</i> | MH048927 |
| <i>Coelothrix irregularis</i>      | Red    | K0206    | Oct-16 | 7    | slope | <i>G. divaricata</i> | <i>rbcL</i> | MH048928 |
| <i>Hypnea caespitosa</i>           | Red    | K0204    | Oct-16 | 7    | slope | <i>G. divaricata</i> | <i>rbcL</i> | MH048929 |
| <i>Hypnea caespitosa</i>           | Red    | K0203    | Oct-16 | 7    | slope | <i>G. divaricata</i> | <i>rbcL</i> | MH048930 |
| <i>Hypnea caespitosa</i>           | Red    | SD17120  | Aug-17 | 7    | slope | <i>G. divaricata</i> | <i>rbcL</i> | MH048931 |
| <i>Hypnea</i> sp.                  | Red    | K0205    | Oct-16 | 7    | slope | <i>G. divaricata</i> | <i>rbcL</i> | MH048932 |
| <i>Lobophora</i> sp28 <sup>a</sup> | Brown  | SD17023  | Aug-17 | 7    | slope | <i>G. divaricata</i> | <i>rbcL</i> | MH048934 |
| <i>Lobophora</i> sp28              | Brown  | SD17021  | Aug-17 | 7    | slope | <i>G. divaricata</i> | <i>rbcL</i> | MH048935 |
| <i>Lobophora</i> sp28              | Brown  | SD17019  | Aug-17 | 7    | slope | <i>G. divaricata</i> | <i>rbcL</i> | MH048936 |
| <i>Lobophora</i> sp28              | Brown  | SD17017  | Aug-17 | 7    | slope | <i>G. divaricata</i> | <i>rbcL</i> | MH048937 |
| <i>Lobophora</i> sp28              | Brown  | K0173    | Apr-16 | 7    | slope | Coral                | <i>rbcL</i> | MH048940 |
| <i>Lobophora</i> sp28              | Brown  | SD17058  | Aug-17 | 9    | slope | Coral                | <i>rbcL</i> | MH048941 |
| <i>Padina</i> sp5 <sup>b</sup>     | Brown  | SD17114  | Aug-17 | 7    | slope | <i>G. divaricata</i> | <i>rbcL</i> | MH048933 |
| <i>Caulerpa chemnitzia</i>         | Green  | SD17117  | Aug-17 | 7    | slope | <i>G. divaricata</i> | <i>tufA</i> | MH048959 |

621 <sup>a</sup>Denomination according to [1].

622 <sup>b</sup>Denomination according to [2].

623

624 **S3 Table. Information and Genbank numbers of *Galaxaura divaricata* samples from various locations in the lagoon of Dongsha Atoll that were used**  
 625 **for DNA barcoding in this study.**

| Species              | Voucher# | Date   | Site | Area  | Substrate | Thallus size | Marker      | GenBank# |
|----------------------|----------|--------|------|-------|-----------|--------------|-------------|----------|
| <i>G. divaricata</i> | K0210    | Apr-16 | 7    | slope | rock      | medium       | <i>rbcL</i> | MH048946 |
| <i>G. divaricata</i> | R90B12   | Feb-14 | 9    | top   | rock      | large        | <i>rbcL</i> | MH048942 |
| <i>G. divaricata</i> | SD17048  | Aug-17 | 9    | slope | rubble    | large        | <i>rbcL</i> | MH048957 |
| <i>G. divaricata</i> | SD17098  | Aug-17 | 6    | top   | rock      | small        | <i>rbcL</i> | MH048943 |
| <i>G. divaricata</i> | SD17099  | Aug-17 | 1    | top   | rock      | small        | <i>rbcL</i> | MH048956 |
| <i>G. divaricata</i> | SD17100  | Aug-17 | 5    | top   | rock      | small        | <i>rbcL</i> | MH048955 |
| <i>G. divaricata</i> | SD17101  | Aug-17 | 5    | top   | rock      | small        | <i>rbcL</i> | MH048958 |
| <i>G. divaricata</i> | SD17102  | Aug-17 | 5    | slope | rock      | medium       | <i>rbcL</i> | MH048954 |
| <i>G. divaricata</i> | SD17103  | Aug-17 | 1    | slope | rock      | small        | <i>rbcL</i> | MH048953 |
| <i>G. divaricata</i> | SD17104  | Aug-17 | 6    | slope | rock      | medium       | <i>rbcL</i> | MH048952 |
| <i>G. divaricata</i> | SD17105  | Aug-17 | 5    | slope | rock      | medium       | <i>rbcL</i> | MH048951 |
| <i>G. divaricata</i> | SD17106  | Aug-17 | 6    | slope | rock      | small        | <i>rbcL</i> | MH048950 |
| <i>G. divaricata</i> | SD17107  | Aug-17 | 6    | slope | rock      | small        | <i>rbcL</i> | MH048944 |
| <i>G. divaricata</i> | SD17110  | Aug-17 | 6    | top   | coral     | medium       | <i>rbcL</i> | MH048949 |
| <i>G. divaricata</i> | SD17112  | Aug-17 | 4    | slope | rock      | medium       | <i>rbcL</i> | MH048948 |
| <i>G. divaricata</i> | SD17113  | Aug-17 | 4    | slope | rock      | small        | <i>rbcL</i> | MH048947 |

626

627

628

629 **S4 Table. Statistics summary of 2-way ANOVA of major benthic categories (live corals, total**  
 630 **macroalgae, CCA, and other substrates) between two reef areas among 12 sites.**

| Source of variation                   | <i>df</i> | Mean Sq | <i>F</i> | <i>P</i>  |
|---------------------------------------|-----------|---------|----------|-----------|
| <i>Corals</i>                         |           |         |          |           |
| area (top > slope; dif: 3.15)         | 1         | 2673    | 6.617    | 0.0102*   |
| site                                  | 11        | 11036   | 27.321   | <2e-16*   |
| area × site                           | 11        | 7110    | 17.601   | <2e-16*   |
| error                                 | 1056      | 404     |          |           |
| <i>Total macroalgae</i>               |           |         |          |           |
| area (top > slope; dif: 5.03)         | 1         | 6835    | 20.68    | 6.07e-06* |
| site                                  | 11        | 16025   | 48.48    | <2e-16*   |
| area × site                           | 11        | 8684    | 26.27    | <2e-16*   |
| error                                 | 1056      | 331     |          |           |
| <i>Crustose coralline algae (CCA)</i> |           |         |          |           |
| area (top > slope; dif: 1.36)         | 1         | 500.2   | 62.725   | 5.99e-15* |
| site                                  | 11        | 44.0    | 5.514    | 1.29e-08* |
| area × Site                           | 11        | 28.8    | 3.616    | 4.88e-05* |
| error                                 | 1056      | 8.0     |          |           |
| <i>Other substrates</i>               |           |         |          |           |
| area (top < slope; dif: 9.54)         | 1         | 24548   | 41.30    | 1.97e-10* |
| site                                  | 11        | 18205   | 30.63    | <2e-16*   |
| area × site                           | 11        | 10405   | 17.51    | <2e-16*   |
| error                                 | 1056      | 594     |          |           |

631 \*Asterisk indicates a statistically significance at the p value < 0.05.

632

633 **S5 Table. Statistics summary of 2-way ANOVA of the *G. divaricata* percent cover between two reef**  
634 **areas among 13 sites.**

| <b>Source of variation</b>    | <b><i>df</i></b> | <b>Mean Sq</b> | <b><i>F</i></b> | <b><i>P</i></b> |
|-------------------------------|------------------|----------------|-----------------|-----------------|
| <i>G. divaricata</i>          |                  |                |                 |                 |
| area (top < slope; dif: 1.20) | 1                | 423            | 6.574           | 0.0105*         |
| site                          | 12               | 11536          | 179.278         | <2e-16*         |
| area × site                   | 12               | 480            | 7.460           | 2.28e-13*       |
| error                         | 1144             | 64             |                 |                 |

635 \*Asterisk indicates a statistically significance at the p value < 0.05.

636

637 **S6 Table. Percent cover of *Galaxaura divaricata* on 13 patch reef sites in the lagoon of Dongsha**  
 638 **Atoll, South China Sea.**

| Site | Location  | Patch reef area          |                | Cover rank      |
|------|-----------|--------------------------|----------------|-----------------|
|      |           | Top (1-5 m)              | Slope (5-10 m) |                 |
| 1    | North     | 0.02 ± 0.08 <sup>a</sup> | 0.02 ± 0.15    | very low        |
| 2    | North     | 0                        | 0              | very low        |
| 3    | North     | 0.27 ± 0.78              | 0.31 ± 0.9     | very low        |
| 4    | Northeast | 1.52 ± 1.9               | 1.47 ± 1.95    | very low - low  |
| 5    | Northeast | 5.69 ± 5.47              | 3.37 ± 5.62    | low - moderate  |
| 6    | Northeast | 0.79 ± 1.36              | 0.21 ± 0.34    | very low        |
| 7    | Southeast | 0.02 ± 0.15              | 15.86 ± 17     | very low - high |
| 8    | Southeast | 0.17 ± 0.67              | 4.31 ± 6.67    | very low - low  |
| 9    | Southeast | 41.87 ± 24.73            | 40.87 ± 25.58  | high            |
| 10   | South     | 0                        | 0              | very low        |
| 11   | Center    | 0.46 ± 1.41              | 0.02 ± 0.15    | very low        |
| 12   | West      | 0                        | 0              | very low        |
| 13   | West      | 0                        | 0              | very low        |

639 <sup>a</sup>Data are relative cover expressed as mean ± SD (%) of 45 replicate quadrats for reef top and reef slope.

640

641 **S7 Table. Statistics summary of 2-way ANOVA of the percent cover in two major benthic**  
642 **categories (*G. divaricata* and corals) over time.**

| <b>Source of variation</b>    | <b><i>df</i></b> | <b>Mean Sq</b> | <b><i>F</i></b> | <b><i>P</i></b> |
|-------------------------------|------------------|----------------|-----------------|-----------------|
| <i>Two benthic categories</i> |                  |                |                 |                 |
| benthic category              | 1                | 26.84          | 0.086           | 0.770           |
| time                          | 3                | 197.58         | 0.632           | 0.595           |
| benthic category × time       | 3                | 113.44         | 0.363           | 0.780           |
| error                         | 352              | 312.61         |                 |                 |

643

644



645 **S8 Table. Paucity of macrobenthic invertebrates in the Dongsha lagoon.**

| <b>Macrobenthic fauna</b>    | <b>Count</b> | <b>Density (individual/100 m<sup>2</sup>)</b> |
|------------------------------|--------------|-----------------------------------------------|
| <i>Diadema savignyi</i>      | 3            | 0.03                                          |
| <i>Diadema setosum</i>       | 1            | 0.01                                          |
| <i>Echinometra mathaei</i>   | 126          | 1.26                                          |
| <i>Echinothrix calamaris</i> | 3            | 0.03                                          |
| <i>Tripneustes gratilla</i>  | 4            | 0.04                                          |
| <i>Culcita novaeguineae</i>  | 54           | 0.54                                          |
| <i>Echinaster luzonicus</i>  | 2            | 0.02                                          |
| <i>Fromia</i> spp.           | 8            | 0.08                                          |
| <i>Linckia multifora</i>     | 15           | 0.15                                          |
| <i>Holothuria</i>            | 0            | 0                                             |
| <i>Cypraea tigris</i>        | 3            | 0.03                                          |
| Giant clam                   | 34           | 0.34                                          |
| <i>Lambis</i> spp.           | 3            | 0.03                                          |
| Lobster                      | 0            | 0                                             |

646 Data derived from a belt transect survey of 13 patch reefs and seven seagrass beds (10,000 m<sup>2</sup> total area  
647 surveyed) across the lagoon of Dongsha Atoll in September 2017.

648

649
